# Supplementary material for: Sequential targeting of PARP with carboplatin inhibits primary tumour growth and distant metastasis in triple-negative breast cancer
Source: PubMed Central journal article supplement (PMC10147920; doi:10.1038/s41416-023-02226-w), 2023-03-20
Supplement: 41416_2023_2226_MOESM1_ESM.pdf [file 41416_2023_2226_MOESM1_ESM.pdf]

## Supplementary Methods

| REAGENT or RESOURCE                                     | SOURCE                                                                                                                                | IDENTIFIER                                                                                                                                        |
|---------------------------------------------------------|---------------------------------------------------------------------------------------------------------------------------------------|---------------------------------------------------------------------------------------------------------------------------------------------------|
| <b>Antibodies</b>                                       |                                                                                                                                       |                                                                                                                                                   |
| Cleaved-PARP                                            | Cell Signaling                                                                                                                        | Cat #9546                                                                                                                                         |
| 53BP1                                                   | Novus Biologicals                                                                                                                     | Cat #NB100-904                                                                                                                                    |
| Alexa 647 donkey anti-rabbit                            | Life Technologies                                                                                                                     | Cat #A31573                                                                                                                                       |
| Alexa 488 donkey anti-mouse                             | Life Technologies                                                                                                                     | Cat #A21202                                                                                                                                       |
| HCS Nuclear Mask                                        | Life Technologies                                                                                                                     | Cat #H10325                                                                                                                                       |
| gH2AX-AlexaFluor 647                                    | BioLegend                                                                                                                             | Cat #613408                                                                                                                                       |
| Phospho-Histone H3-AlexaFluor 488 (Ser-10)              | Cell Signaling                                                                                                                        | Cat #3465                                                                                                                                         |
| Cleaved-caspase 3-Pacific Blue                          | Cell Signaling                                                                                                                        | Cat #8788                                                                                                                                         |
| Rat anti-BrdU (clone BU1/75 (ICR1))                     | Abcam                                                                                                                                 | Cat #ab6326                                                                                                                                       |
| Mouse anti-BrdU [clone B44]                             | BD Biosciences                                                                                                                        | Cat #347580                                                                                                                                       |
| Anti-Rat AlexaFluor 568                                 | Invitrogen                                                                                                                            | Cat #A11077                                                                                                                                       |
| <b>Chemicals, peptides, and recombinant proteins</b>    |                                                                                                                                       |                                                                                                                                                   |
| Talazoparib                                             | Pfizer                                                                                                                                |                                                                                                                                                   |
| Carboplatin (in-vitro)                                  | Selleckchem                                                                                                                           | Cat #S1215                                                                                                                                        |
| Carboplatin (in-vivo)                                   | CHUM pharmacy                                                                                                                         |                                                                                                                                                   |
| Olaparib                                                | Selleckchem                                                                                                                           | Cat #S1060                                                                                                                                        |
| Niraparib                                               | Selleckchem                                                                                                                           | Cat #S2741                                                                                                                                        |
| Hematoxylin QS Counterstain                             | Vector Laboratories                                                                                                                   | Cat #H3404                                                                                                                                        |
| Propidium Iodide                                        | Invitrogen                                                                                                                            | Cat #P3566                                                                                                                                        |
| Chloro-2'-deoxyuridine (CldU)                           | Sigma-Aldrich                                                                                                                         | Cat #C6891                                                                                                                                        |
| 5-Iodo-2'-deoxyuridine (IdU)                            | Sigma-Aldrich                                                                                                                         | Cat #I7125                                                                                                                                        |
| <b>Critical commercial assays</b>                       |                                                                                                                                       |                                                                                                                                                   |
| Cell lysis buffer                                       | Cell Signalling                                                                                                                       | Cat #9803                                                                                                                                         |
| Proteome Profiler Array – Human                         | R&D Systems                                                                                                                           | Cat #ARY017                                                                                                                                       |
| Chemokine Array Kit                                     |                                                                                                                                       |                                                                                                                                                   |
| Quantikine ELISA – Human CCL2-MCP1 Immunoassay          | R&D Systems                                                                                                                           | Cat #SCP00                                                                                                                                        |
| Matrigel Matrix Phenol Red Free                         | Fisher Scientific                                                                                                                     | Cat #CB40234C                                                                                                                                     |
| Collagen Type 1, rat tail                               | Millipore Sigma                                                                                                                       | Cat #08-115                                                                                                                                       |
| Cultrex Reduced Growth Factor Basement Membrane Extract | R&D Systems                                                                                                                           | Cat. #3433-005-01                                                                                                                                 |
| ProLong™ Gold antifade Mountant                         | Invitrogen                                                                                                                            | Cat #P36930                                                                                                                                       |
| Pierce BCA Protein Assay Kit                            | ThermoFisher                                                                                                                          | Cat #23225                                                                                                                                        |
| Rneasy FFPE kit                                         | Qiagen                                                                                                                                | Cat #73504                                                                                                                                        |
| <b>Experimental models: Cell lines</b>                  |                                                                                                                                       |                                                                                                                                                   |
| MDAMB231                                                | JW Gray Lab                                                                                                                           | N/A                                                                                                                                               |
| HS578T                                                  | JW Gray Lab                                                                                                                           | N/A                                                                                                                                               |
| SUM149PT                                                | JW Gray Lab                                                                                                                           | N/A                                                                                                                                               |
| HCC1395                                                 | JW Gray Lab                                                                                                                           | N/A                                                                                                                                               |
| HCC1806                                                 | JW Gray Lab                                                                                                                           | N/A                                                                                                                                               |
| HCC1937                                                 | JW Gray Lab                                                                                                                           | N/A                                                                                                                                               |
| MX1                                                     | JW Gray Lab                                                                                                                           | N/A                                                                                                                                               |
| HCC2185                                                 | JW Gray Lab                                                                                                                           | N/A                                                                                                                                               |
| HCC38                                                   | JW Gray Lab                                                                                                                           | N/A                                                                                                                                               |
| HCC1143                                                 | JW Gray Lab                                                                                                                           | N/A                                                                                                                                               |
| MDAMB436                                                | ATCC                                                                                                                                  | Cat #HTB-130                                                                                                                                      |
| BT20                                                    | ATCC                                                                                                                                  | Cat #HTB-19                                                                                                                                       |
| BT549                                                   | ATCC                                                                                                                                  | Cat #HTB-122                                                                                                                                      |
| HCC1187                                                 | ATCC                                                                                                                                  | Cat #CRL-2322                                                                                                                                     |
| BM-MSC                                                  | ATCC                                                                                                                                  | PCS #500-012                                                                                                                                      |
| MCF10A                                                  | AddexBio                                                                                                                              | Cat #C0006015                                                                                                                                     |
| <b>Experimental models: Mice</b>                        |                                                                                                                                       |                                                                                                                                                   |
| NOD.Cg-Prkdcscid Il2rgtm1Wjl/SzJ                        | The Jackson Laboratory                                                                                                                | Cat# 005557                                                                                                                                       |
| <b>Software and algorithms</b>                          |                                                                                                                                       |                                                                                                                                                   |
| GraphPad PRISM 8                                        | GraphPad software                                                                                                                     | <a href="https://www.graphpad.com/scientific-software/prism/">https://www.graphpad.com/scientific-software/prism/</a>                             |
| STATA SE, Version 15                                    | StataCorp LLC                                                                                                                         | <a href="https://www.stata.com/">https://www.stata.com/</a>                                                                                       |
| FlowJo                                                  | BD Biosciences                                                                                                                        | <a href="https://www.flowjo.com/">https://www.flowjo.com/</a>                                                                                     |
| Compusyn                                                | ComboSyn Incorporated                                                                                                                 | <a href="https://www.combosyn.com">https://www.combosyn.com</a>                                                                                   |
| ImageJ                                                  | NIH                                                                                                                                   | <a href="https://imagej.nih.gov/ij/">https://imagej.nih.gov/ij/</a>                                                                               |
| Harmony High Content Imaging and Analysis Software      | Perkin Elmer                                                                                                                          | <a href="https://www.perkinelmer.com/product/harmony-4-8-office-hh17000001">https://www.perkinelmer.com/product/harmony-4-8-office-hh17000001</a> |
| GenePattern, Version 3.9.11                             | National Cancer Institute's Informatics Technology for Cancer Research program and the National Institute of General Medical Sciences | <a href="https://cloud.genepattern.org/gp/pages/index.jsf">https://cloud.genepattern.org/gp/pages/index.jsf</a>                                   |

**10-day chemosensitivity assay and immunofluorescence staining, analysis and visualization** was performed as previously described (1) and detailed below.

### ***In-vitro* 10-day chemosensitivity assay**

For each cell line, cells were seeded in 96 well plates (Cat #3603, Corning) in triplicate wells. Cells were treated with either 9 concentrations (5-fold dilutions) of talazoparib (Pfizer) wherein the highest concentration was 5  $\mu$ M, or 9 concentrations (3-fold dilutions) of carboplatin (Cat #S1215, Selleckchem), wherein the highest concentration was 100  $\mu$ M, or the combination of talazoparib and carboplatin with the same 9 concentrations. Drug treatment occurred 24 hours after cell seeding. Media and drug were changed after 4 to 5 days. Cells were treated for a total of 9 days and then were fixed and permeabilized with 4% paraformaldehyde, diluted from stock paraformaldehyde 32% solution, EM grade (Cat #15714, Electron Microscopy Sciences), and 0.3% Triton X-100 (Cat #T9284, Sigma-Aldrich).

### **Immunofluorescence staining**

We prepared a primary and secondary antibody solution using 2% BSA (Cat #001-000-162, Jackson ImmunoResearch). We used the following primary antibodies: cl-PARP (1:200, Cat #9546, Cell Signaling Technology) and 53BP1 antibody (1:500, Cat #NB100-904, Novus Biologicals). Secondary antibodies included Alexa 488 donkey anti-mouse (1:300, cat # A21202, Life Technologies) and Alexa 647 donkey anti-rabbit (1:300, Cat #A31573, Life Technologies). We used HCS Nuclear Mask (1:2000, Cat #H10325, Life Technologies) to stain the nucleus, which was added at the time of the secondary antibody solution.

### **IC50 Calculation**

Using the drug sensitivity assay plates treated with carboplatin or talazoparib, nuclear stained viable cell counts were obtained from Operetta Analysis Software. Drug dose response curves were calculated from which IC50 values were derived using Graph Pad Prism 8 software. IC50 values were obtained from 2-5 replicate assays.

### **Statistical analysis for immunofluorescence**

We quantified the mean number of 53BP1 foci per nucleus, percentage of cells positive for 53BP1 foci formation, and percentage of cl-PARP+ cells. The 53BP1 product score was calculated by taking the product of the mean number of 53BP1 foci and percentage of cells positive for 53BP1 for each drug concentration. All single-cell analysis was performed using STATA SE (version 15.1, StataCorp).

### **Data visualization of immunofluorescence**

For each drug concentration of talazoparib, carboplatin, and the combination of talazoparib and carboplatin, we created two heatmaps to visualize the 53BP1 product score and the percentage of cells positive for cl-PARP. In all cases, data from each drug treatment were normalized to the DMSO control. Values were scaled to the maximum value to compare across cell lines. Heatmaps were created using a double gradient colour scheme in GraphPad Prism 8.

### **10-day chemosensitivity assay to evaluate impact of different combination strategies**

For the 10-day proliferation experiment described in Fig. 3, the same assay was used as described above, in which image-based analysis was used to enumerate cell counts on day 10. Cells were treated as follows: either 0.3% DMSO control, talazoparib or carboplatin on day 1 if monotherapy, talazoparib + carboplatin on day 1 as concomitant combination (conc. T+C), carboplatin on day 1 followed by talazoparib 24 hours (h) later (seq. C->T), or talazoparib administered on day 1 followed by talazoparib plus carboplatin 48h later (seq. T->C) to model the *in-vivo* treatment strategy with a talazoparib run-in.

### **Drug Treatment Strategies for 72h and 24h assays**

For DNA fiber and flow cytometry experiments, cells were treated for 72h. Cells either received DMSO control, talazoparib at 0.25  $\mu$ M, carboplatin at 10  $\mu$ M, concurrent combination of talazoparib at 0.25  $\mu$ M plus carboplatin at 10  $\mu$ M. Sequential combination was administered either with carboplatin at 10  $\mu$ M first for 24h, and then talazoparib for 48h (seq. C->T) or with a talazoparib run-in, in which talazoparib was first administered

at 0.25  $\mu$ M for 48 hours, followed by carboplatin (10  $\mu$ M) plus talazoparib (0.25  $\mu$ M) (seq. T->C).

For the cell migration, invasion, chemokine array and ELISA experiments, cells were treated for 24h. To model the in-vivo dosing, cells were treated with either talazoparib at 0.25  $\mu$ M, carboplatin at 10 $\mu$ M, the concurrent combination of talazoparib plus carboplatin (conc. T+C), the sequential combination of carboplatin first for 4h, followed by talazoparib for 20h (seq. C->T), or the sequential combination of talazoparib first for 12 hours, followed by carboplatin for 12 hours (seq. T->C). Following drug treatment, cells were starved for 24 hours.

### Flow Cytometry Gating Strategy

#### Flow Cytometry Gating Strategy

MDAMB231 cells treated with carboplatin for the detection of pH3+gH2AX+ cells.

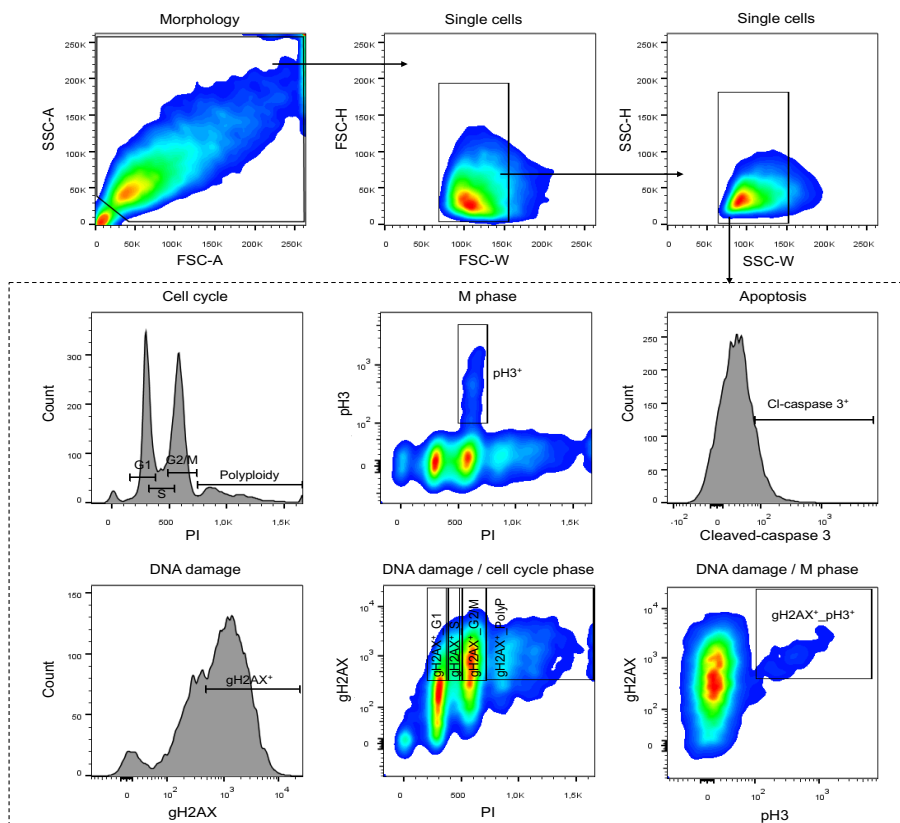

## Animal Studies

### Pilot Experiments

NOD.Cg-Prkdcscid Il2rgtm1Wjl/SzJ (Stock #005557, Jackson Laboratory) were used for all experiments. Mice were acclimatized at our institutional animal quarters (Centre de Recherche de Centre Hospitalier de l'Université de Montréal, (CRCHUM), for 2 weeks prior to intervention. Orthotopic implantation of tumors was performed to better understand the context of the microenvironment and to increase metastatic propensity. For the three orthotopic xenograft models, pilot studies were first conducted at 2 or 5 million cells that were implanted in one mammary fat pad for each mouse (2). Orthotopic surgical implantation consisted of general anesthesia, followed by an incision, in which 0.2 mL of cells were injected into the mammary fat pad #4 under direct vision. Here, tumor volumes and signs of animal distress were recorded, and the date of endpoint for necropsy was identified for subsequent treatment trials. The presence of significant liver and lung micrometastases was only identified in the MDAMB231 orthotopic xenograft model (in 4/4 evaluated mice).

### Treatment Experiments

Tumors were measured with digital calipers and mice weighed twice weekly. Tumor volumes were calculated using the formula  $(x^2 * y)/2$ , where x and y represent the shortest and longest diameters, respectively.

Carboplatin (Centre Hospitalier de l'Université de Montréal (CHUM) pharmacy) was administered intraperitoneally (i.p.) at 35 mg/kg and talazoparib was administered by oral gavage (o.g.) at 0.33 mg/kg. Vehicles used were normal saline for carboplatin, and 5% polyethylene glycol 400 for talazoparib. For each xenograft model, mice either received vehicle control, talazoparib alone (days 1-9), carboplatin alone on day 1, concomitant treatment with talazoparib (day 1-9) and carboplatin on day 1 (conc. T+C); sequential combination with carboplatin first on day 1 followed by talazoparib on day 2-10 (seq. C->T); and another sequential with a talazoparib run-in (days 1-2) followed by carboplatin on day 3, continued with talazoparib (days 3-9).

Due to different tumor kinetics, for HCC1806, the necropsy was performed on day 22 (4 days after completion of drug treatment), and for MDAMB231 and MX1, necropsy was performed on day 42 (16 days after end of treatments). One mouse in the MDAMB231 cohort which received concomitant talazoparib and carboplatin which had to be sacrificed early due to toxicity was excluded from the final *ex-vivo* tumor volume or lung metastasis evaluation.

At necropsy, plasma was procured via a terminal cardiac puncture and processed for a complete blood count at the CHUM Hematology Laboratory. Any coagulated samples were excluded from analysis. Some blood samples were missing manual differentiation, for which neutrophil counts could not be obtained. For each mouse, tumor, lung, and liver organs were harvested. *Ex-vivo* tumors at necropsy were measured by two people (T.H. and S.H.). Lung and liver were examined for macroscopic disease and then fixed in 10% formaldehyde, and formalin-fixed paraffin-embedded blocks were created. Pathologist, D.T-T. blindly reviewed the entire slide of liver and lung parenchyma and reported percentage of area occupied by cancer cells.

### **RNA-Seq Gene Expression and Analysis**

We selected 5 representative archived FFPE tissue blocks from each treatment group from metastatic lung tissue from the MDAMB231 orthotopic xenograft. RNA was extracted using RNeasy FFPE kit (Cat # 73504) at the Molecular Pathology Platform (CRCHUM). RNA was quantified using Qubit (Thermo Scientific) and quality was assessed with the 2100 Bioanalyzer (Agilent Technologies). Samples with a DV200 > 30% were selected. Transcriptome libraries were generated using QIAseq FastSelect ribodepletion selection (Qiagen), followed by KAPA RNA HyperPrep (Roche) at the Institute for Research in Immunology and Cancer (IRIC, Montreal). Sequencing was performed on the Illumina NovaSeq6000 (PE100), at the McGill Genome Center, Montreal. 120M Paired-End reads were obtained per sample.

The first part of the analysis including normalization and DeSeq2 analysis was performed at the Bioinformatics Facility at IRIC. Sequences were trimmed for sequencing adapters and low quality 3' bases using Trimmomatic version 0.35 (3) and aligned on a hybrid

genome formed of the reference human genome version GRCh38 (gene annotation from Gencode version 37, based on Ensembl 103) and mouse genome version GRCm38 (Gencode version M25) using STAR version 2.7.1a (4). DESeq2 version 1.30.1 (5) was then used to normalize gene readcounts (*from the human genes only*) and produce the sample clustering. A principal component analysis was also performed to display the first two most significant components. Using the log<sub>2</sub>-fold change values from the DESeq2 analysis, all expressed genes were ranked and a pre-ranked Gene Set Enrichment Analysis was performed using GenePattern (6). Gene sets from MsigDB were used, including Hallmarks and KEGG for human tissue, and Hallmarks and Biocarta for mouse tissue. FDR cutoff of 25% was used to identify statistically significant gene sets.

## References

1. Hassan S, Esch A, Liby T, Gray JW, Heiser LM. Pathway-Enriched Gene Signature Associated with 53BP1 Response to PARP Inhibition in Triple-Negative Breast Cancer. *Molecular cancer therapeutics*. 2017;16(12):2892-901.
2. Iorns E, Drews-Elger K, Ward TM, Dean S, Clarke J, Berry D, et al. A new mouse model for the study of human breast cancer metastasis. *PloS one*. 2012;7(10):e47995.
3. Bolger, A. M., Lohse, M., & Usadel, B. Trimmomatic: A flexible trimmer for Illumina Sequence Data. *Bioinformatics*, 2014. btu170.
4. Dobin A1, Davis CA, Schlesinger F, Drenkow J, Zaleski C, Jha S, Batut P, Chaisson M, Gingeras TR. STAR: ultrafast universal RNA-seq aligner. *Bioinformatics*. 2013 Jan 1;29(1):15-21.
5. Love MI, Huber W and Anders S. Moderated estimation of fold change and dispersion for RNA-seq data with DESeq2. *Genome Biology*15, 2014: pp. 550.
6. Reich M, Liefeld T, Gould J, Lerner J, Tamayo P, Mesirov JP. [GenePattern 2.0](#) *Nature Genetics* 38 no. 5, 2006: pp500-501.
